# Supplementary material for: Association of the TNF-α-308, TNF-α-238 gene polymorphisms with risk of bone-joint and spinal tuberculosis: a meta-analysis
Source: PubMed Central journal article supplement (PMC6542758; doi:10.1042/bsr20182217), 2019-05-31
Supplement: bsr20182217_Supp1.pdf [file bsr20182217_Supp1.pdf]

## Supplementary Material 1. Search Strategy Used in All Databases

### *Medline via PubMed*

|    | Searches                                                                                        | Results   |
|----|-------------------------------------------------------------------------------------------------|-----------|
| #1 | bone tuberculosis OR spinal tuberculosis OR tuberculosis OR TNF-a gene OR gene OR polymorphisms | 2763      |
| #2 | “risk” OR “influence” OR “relationship” OR “effect” OR “relevance”                              | 2468      |
| #3 | #1 AND #2                                                                                       | <b>56</b> |

### *EMBASE via Elsevier*

|    | Searches                                                                                        | Results |
|----|-------------------------------------------------------------------------------------------------|---------|
| #1 | bone tuberculosis OR spinal tuberculosis OR tuberculosis OR TNF-a gene OR gene OR polymorphisms | 186     |

|    |                                                                  |          |
|----|------------------------------------------------------------------|----------|
| #2 | “risk” OR “influence” OR “relationship”OR “effect”OR “relevance” | 3949     |
| #3 | #1 AND #2                                                        | <b>0</b> |

*CENTRAL*

|    | Searches                                                                                                       | Results  |
|----|----------------------------------------------------------------------------------------------------------------|----------|
| #1 | (bone tuberculosis OR spinal tuberculosis OR tuberculosis OR TNF-a gene OR gene OR polymorphism<br>s):ti,ab,kw | 55       |
| #2 | MeSH descriptor: [relationship] explode all trees                                                              | 112      |
| #3 | (“risk” OR “influence” OR “relationship”OR “effect”OR “relevance” ):ti,ab,kw                                   | 233      |
| #4 | #1 AND (#2 OR #3)                                                                                              | <b>0</b> |

*CINAHL via EBSCO*

|    | Searches                                                                                        | Results  |
|----|-------------------------------------------------------------------------------------------------|----------|
| #1 | bone tuberculosis OR spinal tuberculosis OR tuberculosis OR TNF-a gene OR gene OR polymorphisms | 27       |
| #2 | “risk” OR “influence” OR “relationship”OR “effect”OR “relevance”                                | 207      |
| #3 | #1 AND #2                                                                                       | <b>0</b> |

*AMED via EBSCO*

|    | Searches                                                                                        | Results  |
|----|-------------------------------------------------------------------------------------------------|----------|
| #1 | bone tuberculosis OR spinal tuberculosis OR tuberculosis OR TNF-a gene OR gene OR polymorphisms | 120      |
| #2 | “risk” OR “influence” OR “relationship”OR “effect”OR “relevance”                                | 310      |
| #3 | #1 AND #2                                                                                       | <b>0</b> |

Cochrane Library

|    | Searches                                                                                        | Results  |
|----|-------------------------------------------------------------------------------------------------|----------|
| #1 | bone tuberculosis OR spinal tuberculosis OR tuberculosis OR TNF-a gene OR gene OR polymorphisms | 566      |
| #2 | “risk” OR “influence” OR “relationship”OR “effect”OR “relevance”                                | 758      |
| #3 | #1 AND #2                                                                                       | <b>9</b> |

Web of Science

|  | Searches | Results |
|--|----------|---------|
|--|----------|---------|

|    |                                                                                                 |           |
|----|-------------------------------------------------------------------------------------------------|-----------|
| #1 | bone tuberculosis OR spinal tuberculosis OR tuberculosis OR TNF-a gene OR gene OR polymorphisms | 899       |
| #2 | “risk” OR “influence” OR “relationship”OR “effect”OR “relevance”                                | 1113      |
| #3 | #1 AND #2                                                                                       | <b>25</b> |

*CNKI*

|    | Searches                                                                                                                                                                          | Results   |
|----|-----------------------------------------------------------------------------------------------------------------------------------------------------------------------------------|-----------|
| #1 | (SU='骨结核'+ '脊柱结核'+ '结核'+ '肿瘤坏死因子a基因'+ '肿瘤坏死因子a基因'+ '多态性'因'+bone tuberculosis'+ 'spinal tuberculosis'+ 'tuberculosis'+ 'TNF-a gene'+ 'gene'+ 'polymorphisms') AND (SU='骨结核'+ '基因') | <b>20</b> |

*Wanfang data*

|    | Searches                                                                                                                                                                  | Results   |
|----|---------------------------------------------------------------------------------------------------------------------------------------------------------------------------|-----------|
| #1 | ('骨结核'+ '脊柱结核'+ '结核'+ '肿瘤坏死因子a基因'+ '肿瘤坏死因子a基因'+ '多态性'因'+bone tuberculosis'+ 'spinal tuberculosis'+ 'tuberculosis'+ 'TNF-a gene'+ 'gene'+ 'polymorphisms') * ('骨结核'+ '基因') | <b>15</b> |

*VIP*

|  | Searches | Results |
|--|----------|---------|
|  |          |         |

|    |                                                                                                                                                                                                                            |   |
|----|----------------------------------------------------------------------------------------------------------------------------------------------------------------------------------------------------------------------------|---|
| #1 | 题名或关键词=骨结核 或者 题名或关键词=脊柱结核 或者 题名或关键词=结核 或者 题名或关键词=肿瘤坏死因子a基因 或者 题名或关键词=多态性 或者 题名或关键词=bone tuberculosis 或者 题名或关键词=针刀 或者 题名或关键词=spinal tuberculosis题名或关键词=tuberculosis 或者 题名或关键词=TNF-a gene 或者 题名或关键词=gene题名或关键词=polymorphisms | 0 |
|----|----------------------------------------------------------------------------------------------------------------------------------------------------------------------------------------------------------------------------|---|

*OASIS*

|    | Searches        | Results |
|----|-----------------|---------|
| #1 | 뼈결핵 AND 유전자 다형성 | 0       |

*KCI*

|    | Searches        | Results |
|----|-----------------|---------|
| #1 | 뼈결핵 AND 유전자 다형성 | 0       |

*RISS*

|    | Searches        | Results |
|----|-----------------|---------|
| #1 | 뼈결핵 AND 유전자 다형성 | 0       |
